# Supplementary material for: Parallel Multi-Omics in High-Risk Subjects for the Identification of Integrated Biomarker Signatures of Type 1 Diabetes
Source: MDPI journal article supplement (doi:10.3390/biom11030383), 2021-03-04
Supplement: s1 [file s1]

# Parallel Multi-Omics in High-Risk Subjects for the Identification of Integrated Biomarker Signatures of Type 1 Diabetes

Oscar Alcazar<sup>1,#</sup>, Luis F. Hernandez<sup>2,#</sup>, Ernesto S. Nakayasu<sup>3</sup>, Carrie D. Nicora<sup>4</sup>, Charles Ansong<sup>5</sup>, Michael J. Muehlbauer<sup>6</sup>, James R. Bain<sup>7</sup>, Ciara J. Myer<sup>8</sup>, Sanjoy K. Bhattacharya<sup>9</sup>, Peter Buchwald<sup>10,#,\*</sup>, and Midhat H. Abdulreda<sup>11,#,\*</sup>

<sup>1</sup> University of Miami Miller School of Medicine, Diabetes Research Institute, Miami, FL, USA; email: [o.alcazar@miami.edu](mailto:o.alcazar@miami.edu)

<sup>2</sup> University of Miami Miller School of Medicine, Diabetes Research Institute, Miami, FL, USA; email: [lfh34@miami.edu](mailto:lfh34@miami.edu)

<sup>3</sup> Biological Sciences Division, Pacific Northwest National Laboratory, Richland, WA, USA; email: [ernesto.nakayasu@pnl.gov](mailto:ernesto.nakayasu@pnl.gov)

<sup>4</sup> Biological Sciences Division, Pacific Northwest National Laboratory, Richland, WA, USA; email: [carrie.nicora@pnl.gov](mailto:carrie.nicora@pnl.gov)

<sup>5</sup> Biological Sciences Division, Pacific Northwest National Laboratory, Richland, WA, USA; email: [Charles.Ansong@pnl.gov](mailto:Charles.Ansong@pnl.gov)

<sup>6</sup> Duke Molecular Physiology Institute, Duke University Medical Center, Durham, NC, USA. email: [michael.muehlbauer@duke.edu](mailto:michael.muehlbauer@duke.edu)

<sup>7</sup> Duke Molecular Physiology Institute, Duke University Medical Center, Durham, NC, USA. email: [james.bain@duke.edu](mailto:james.bain@duke.edu)

<sup>8</sup> University of Miami Miller School of Medicine, Department of Ophthalmology and Miami Integrative Metabolomics Research Center, Miami, FL, USA; email: [cxm1496@miami.edu](mailto:cxm1496@miami.edu)

<sup>9</sup> University of Miami Miller School of Medicine, Department of Ophthalmology and Miami Integrative Metabolomics Research Center, Miami, FL, USA. email: [sbhattacharya@miami.edu](mailto:sbhattacharya@miami.edu)

<sup>10</sup> University of Miami Miller School of Medicine, Diabetes Research Institute, and Department of Molecular and Cellular Pharmacology, Miami, FL, USA. email: [pbuchwald@miami.edu](mailto:pbuchwald@miami.edu)

<sup>11</sup> University of Miami Miller School of Medicine, Diabetes Research Institute, Department of Surgery, Department of Microbiology and Immunology, and Department of Ophthalmology, Miami, FL, USA; email: [mabdulreda@miami.edu](mailto:mabdulreda@miami.edu)

<sup>#</sup> These authors contributed equally

<sup>\*</sup> Correspondence emails [mabdulreda@miami.edu](mailto:mabdulreda@miami.edu) or [pbuchwald@miami.edu](mailto:pbuchwald@miami.edu)

## Supplementary Materials Content

- **Figure S1.** Regulator Effects three-tier diagrams (networks) relevant to immune activation and inflammatory processes predicted at different analysis cutoff threshold values.
- **Figure S2.** High-resolution versions of the networks shown in **Figure 5**.
- **Figure S3.** Networks predicted at various levels of analysis stringency summarized in **Figure 6**.
- **Figure S4.** Scatter plot of  $p$ -values comparing (by t-test) the variance within the high-risk T1D group with and without the one new-onset subject.
- **Table S1.** Demographic, serological, and other information of subjects from whom blood samples were obtained in this study.
- **Table S2.** Transcriptomics data quality control information.
- **Table S3.** Complete list of candidate biomarkers predicted by *IPA* in the individual omics datasets without any curation in the context of the global molecular network predicted in the integrated multi-omics dataset at fold-change cutoff value of 1.1 during feature selection in the integrative analysis.

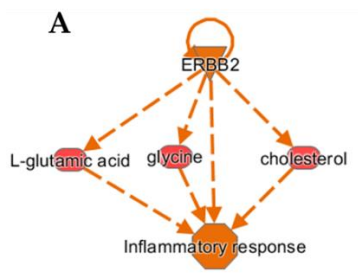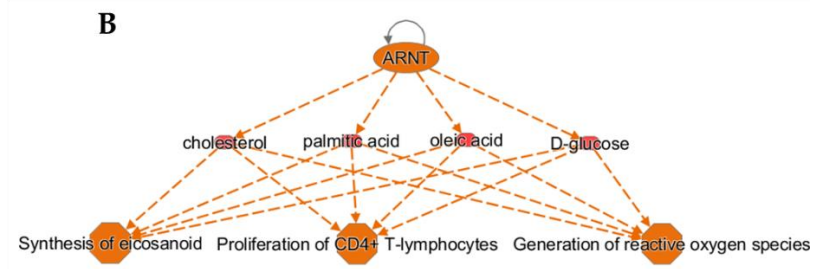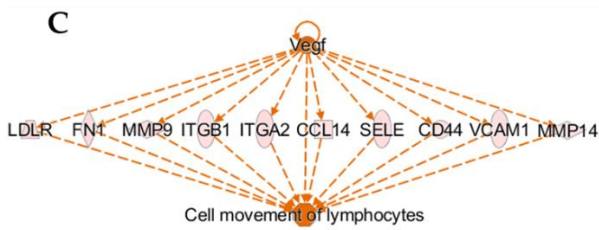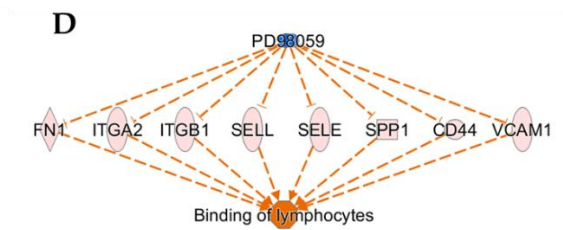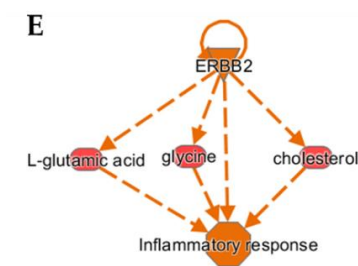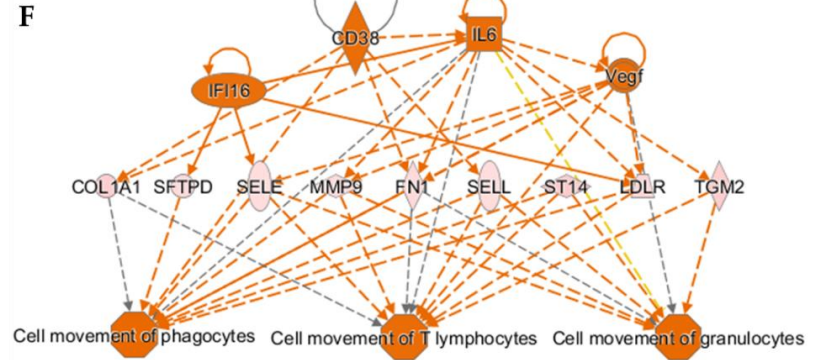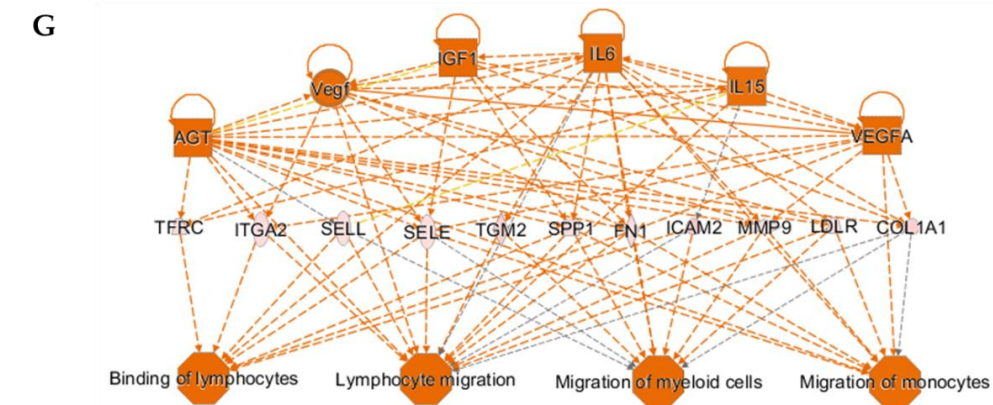

H

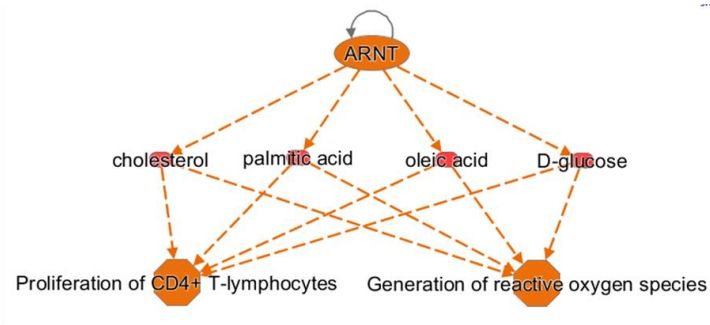

I

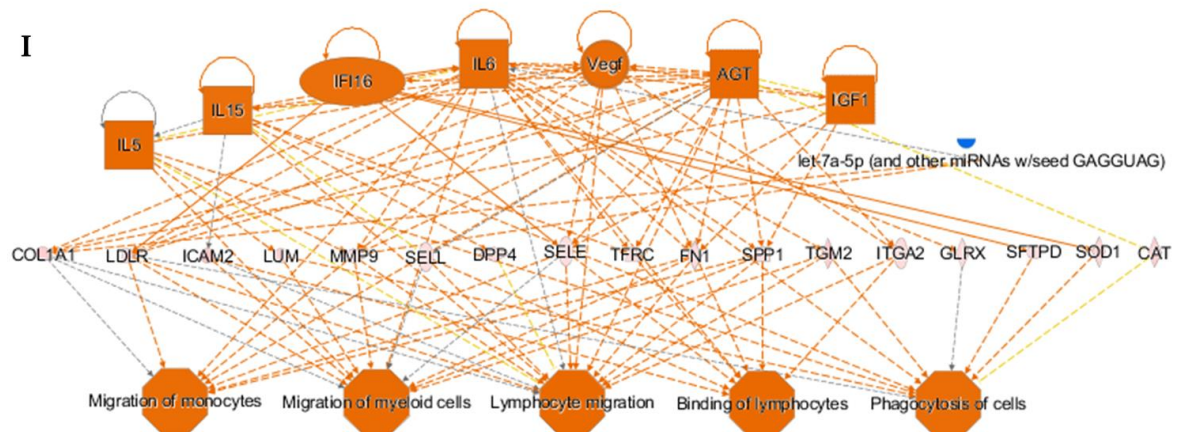

J

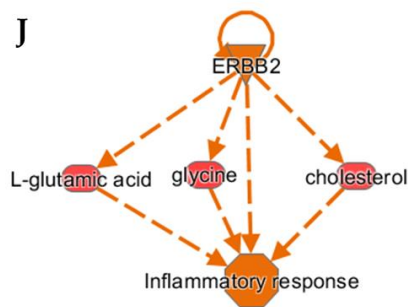

K

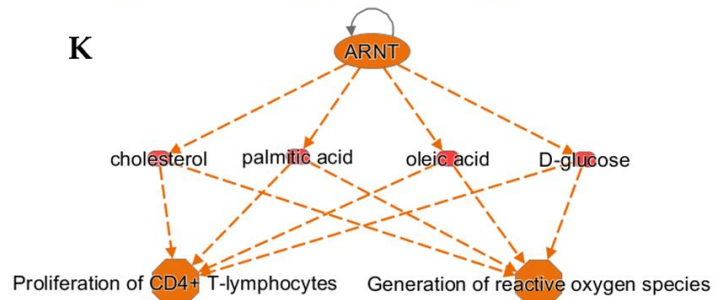

L

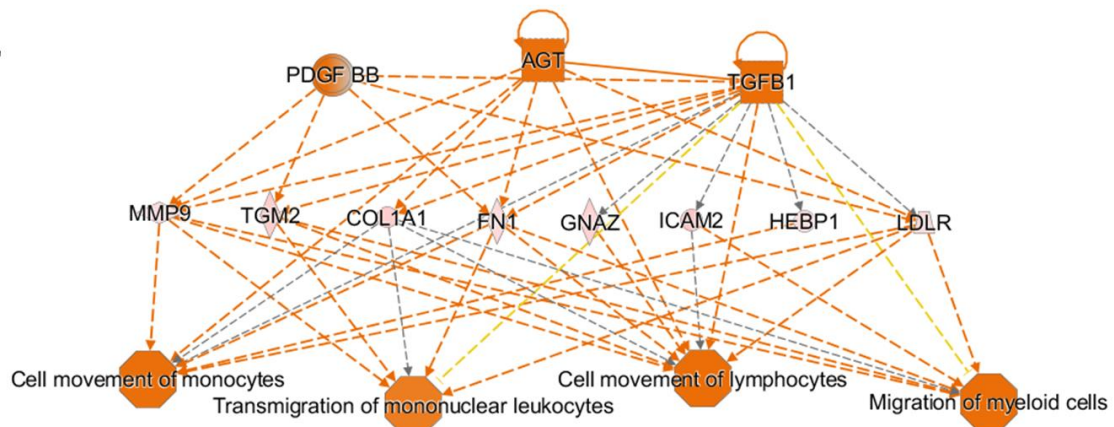

**Figure S1 (corresponds to Figure 4).** Regulator Effects three-tier diagrams (networks) predicted at the different feature selection thresholds (fold-change cutoff values). Predictions at cutoff values (A–D) 1.1, (E–I) 1.2, and (J–L) 1.3 using the “Regulator Effects” module of the IPA software. Analyses at the cutoff values 2.0 or 3.0 did not yield any predictions. Marker key – Triangle: kinase horizontal-oval: transcription regulator; vertical-oval: transmembrane receptor; diamond: enzyme; square: cytokine; horizontal ellipse: metabolite; circle: other; octagon: function. Color key – orange: predicted activation, blue: predicted inhibition. Connecting line color key – orange: activation; blue: inhibition; yellow: findings are inconsistent with the state of the downstream molecule; and gray: not predicted.



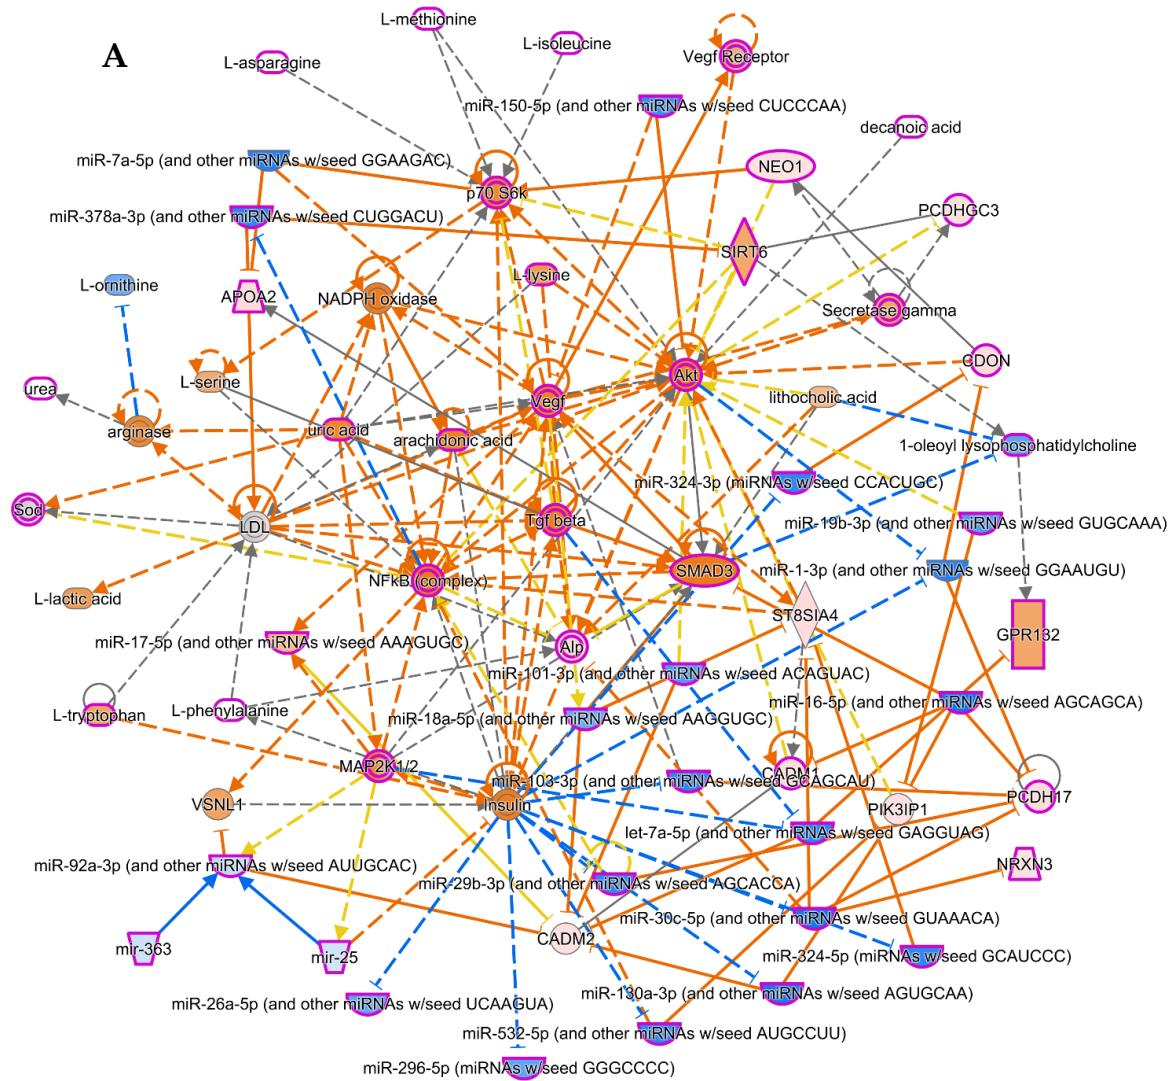

**B**

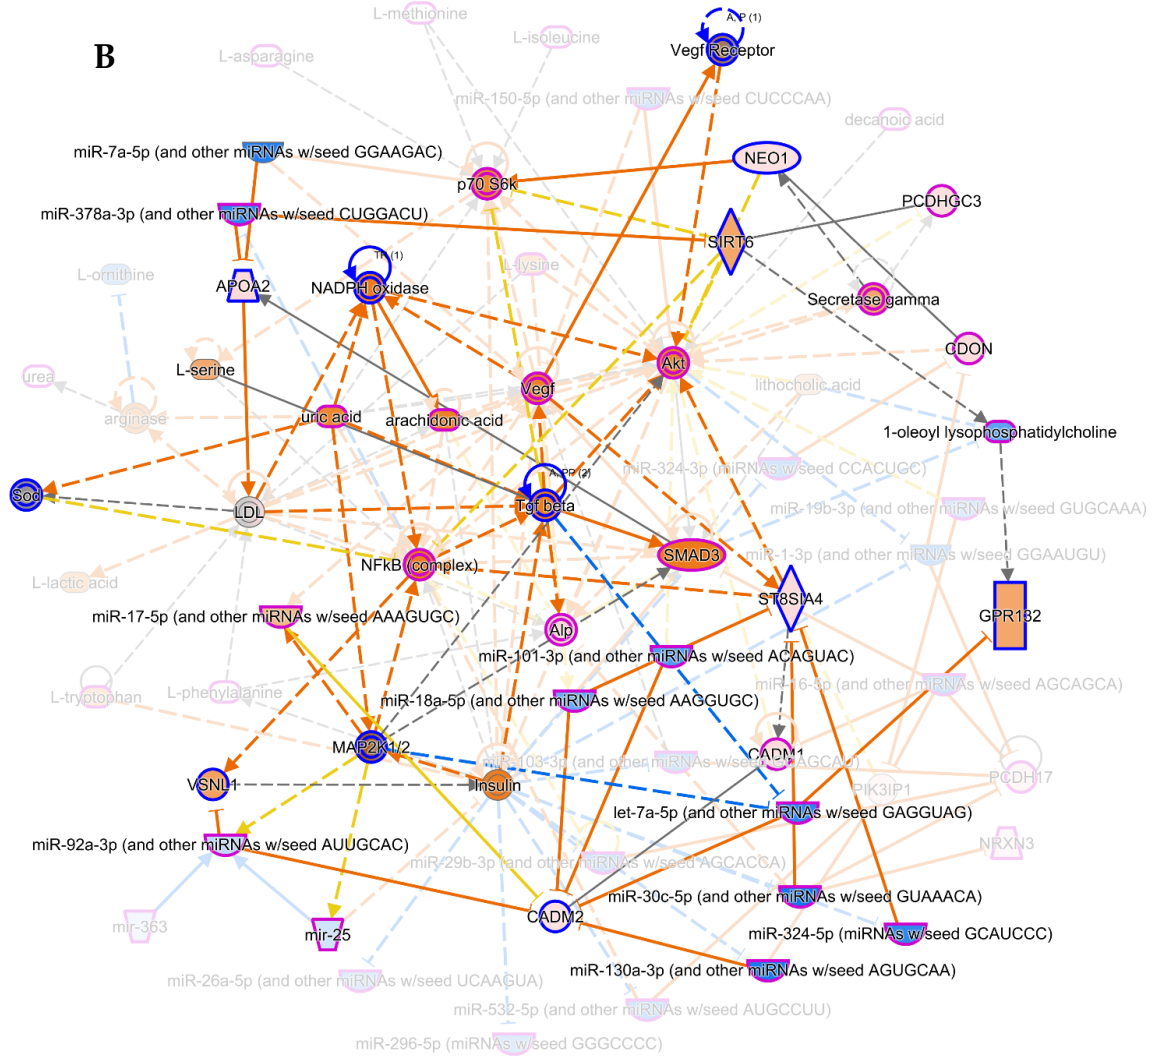

C

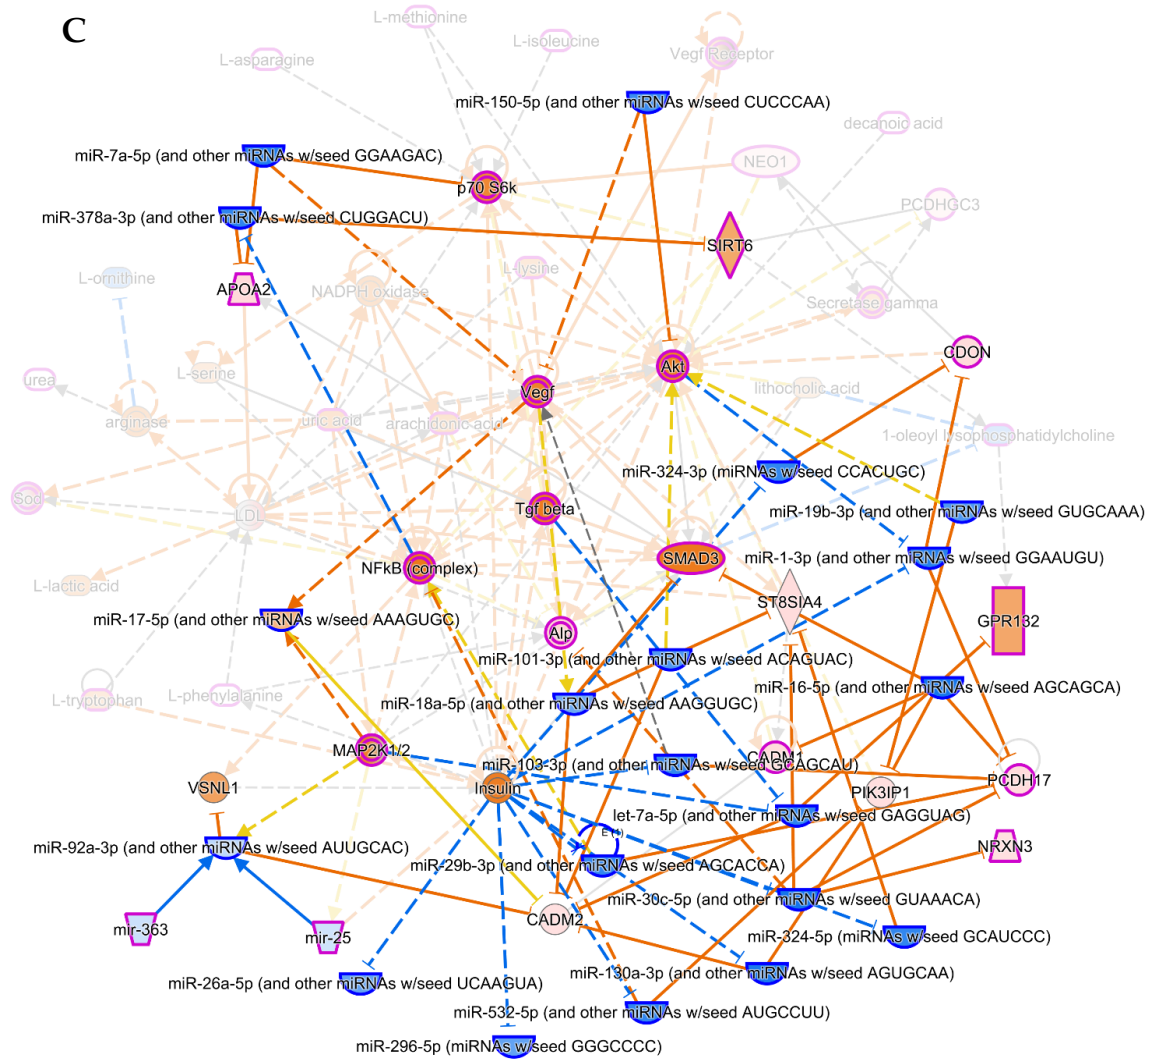











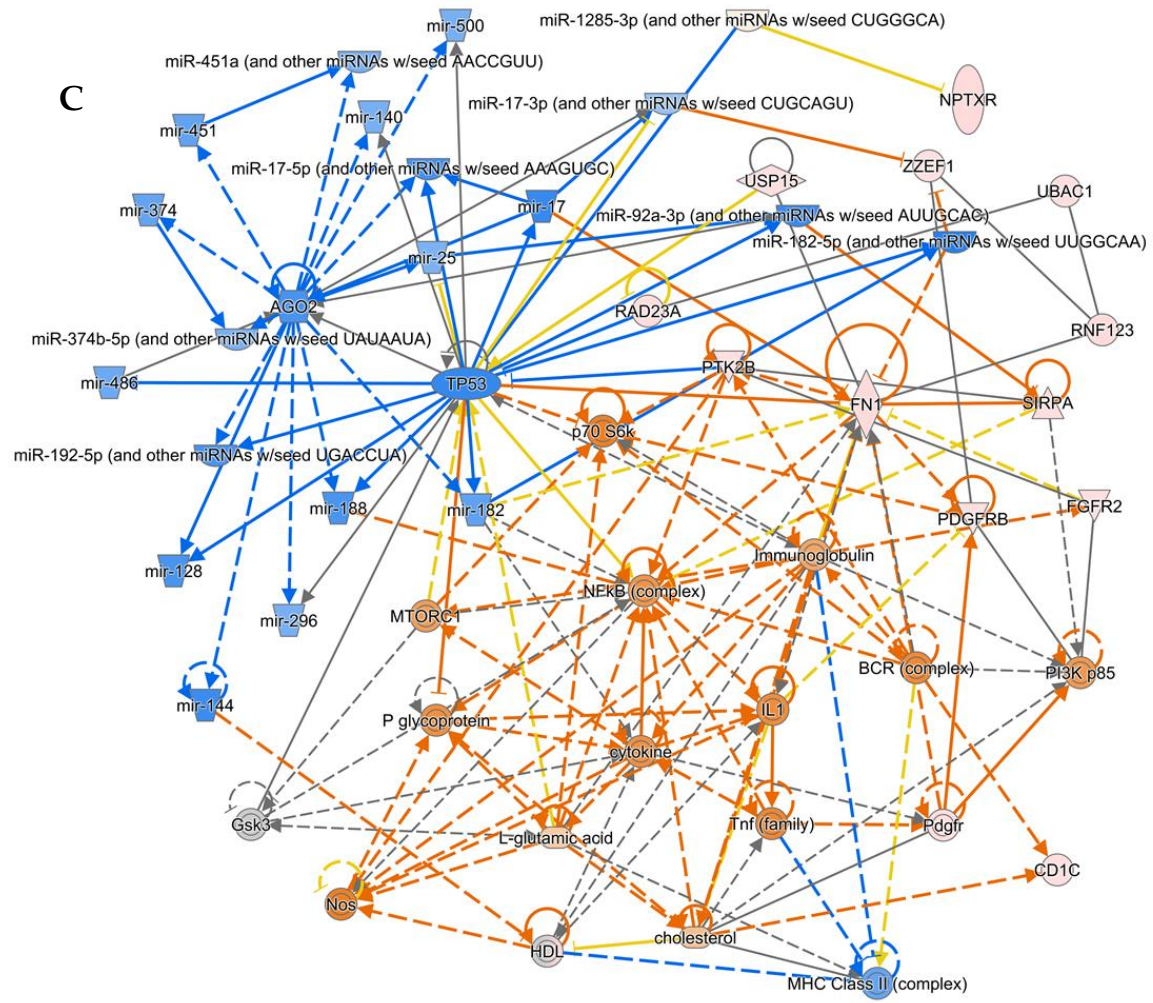

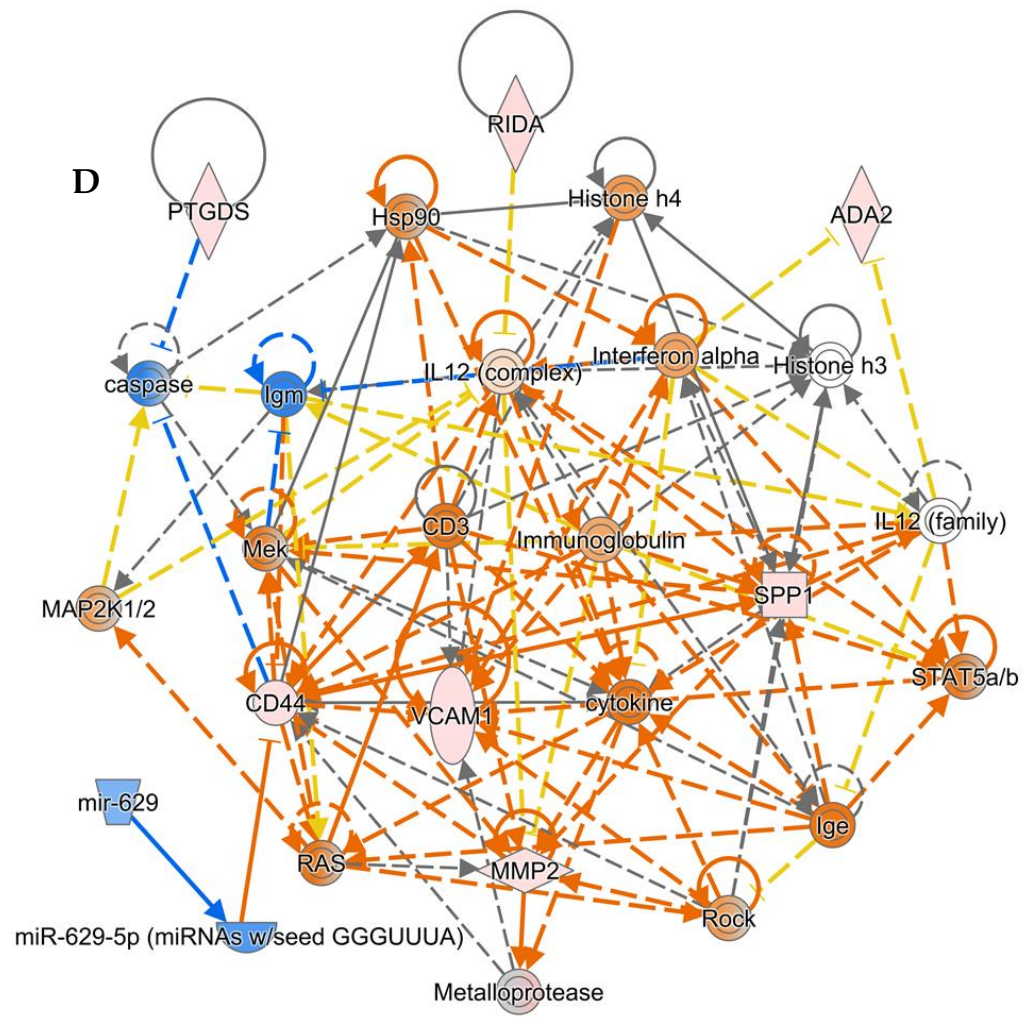

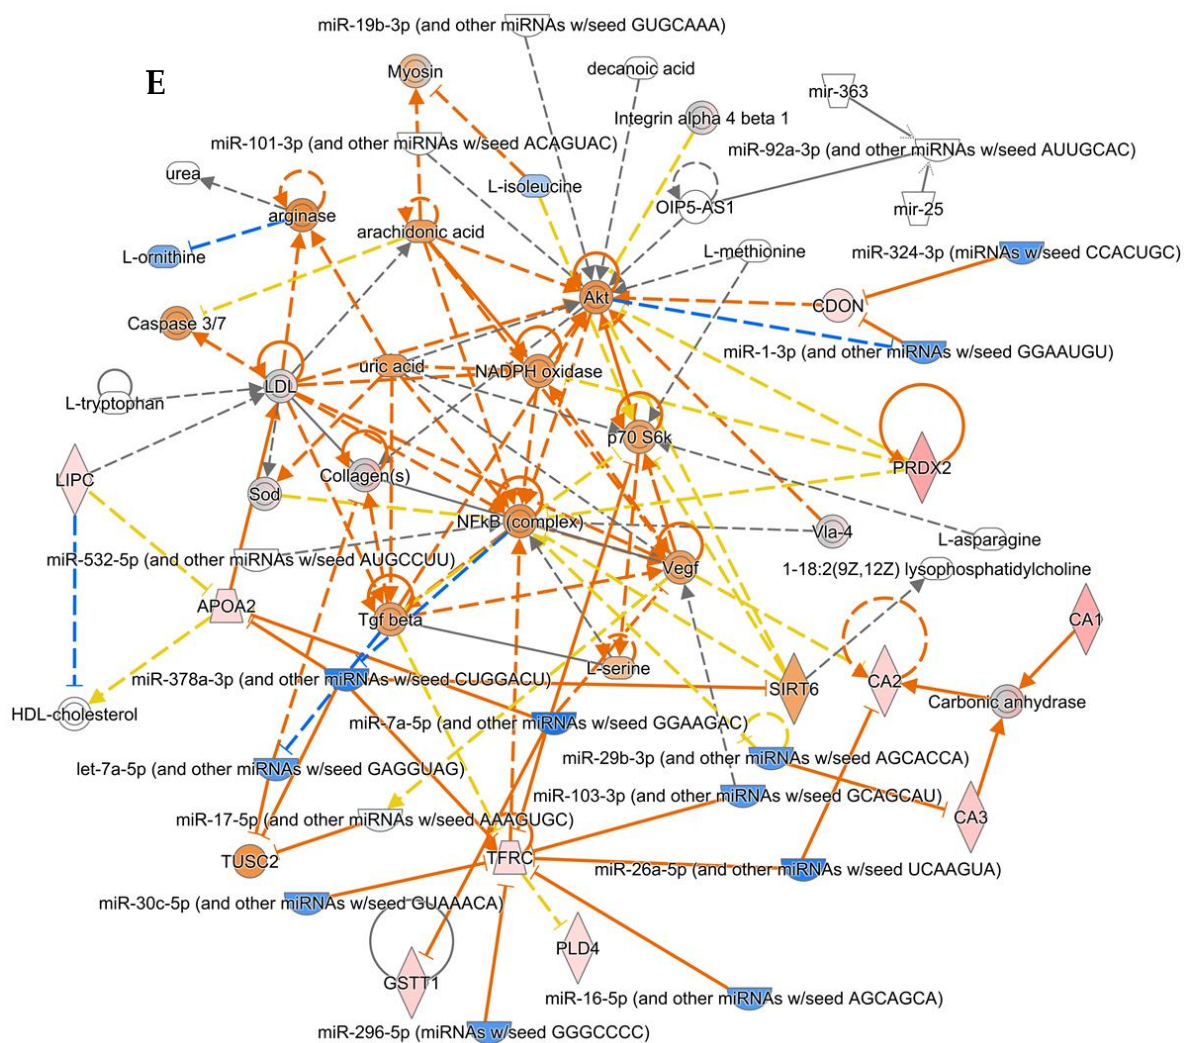



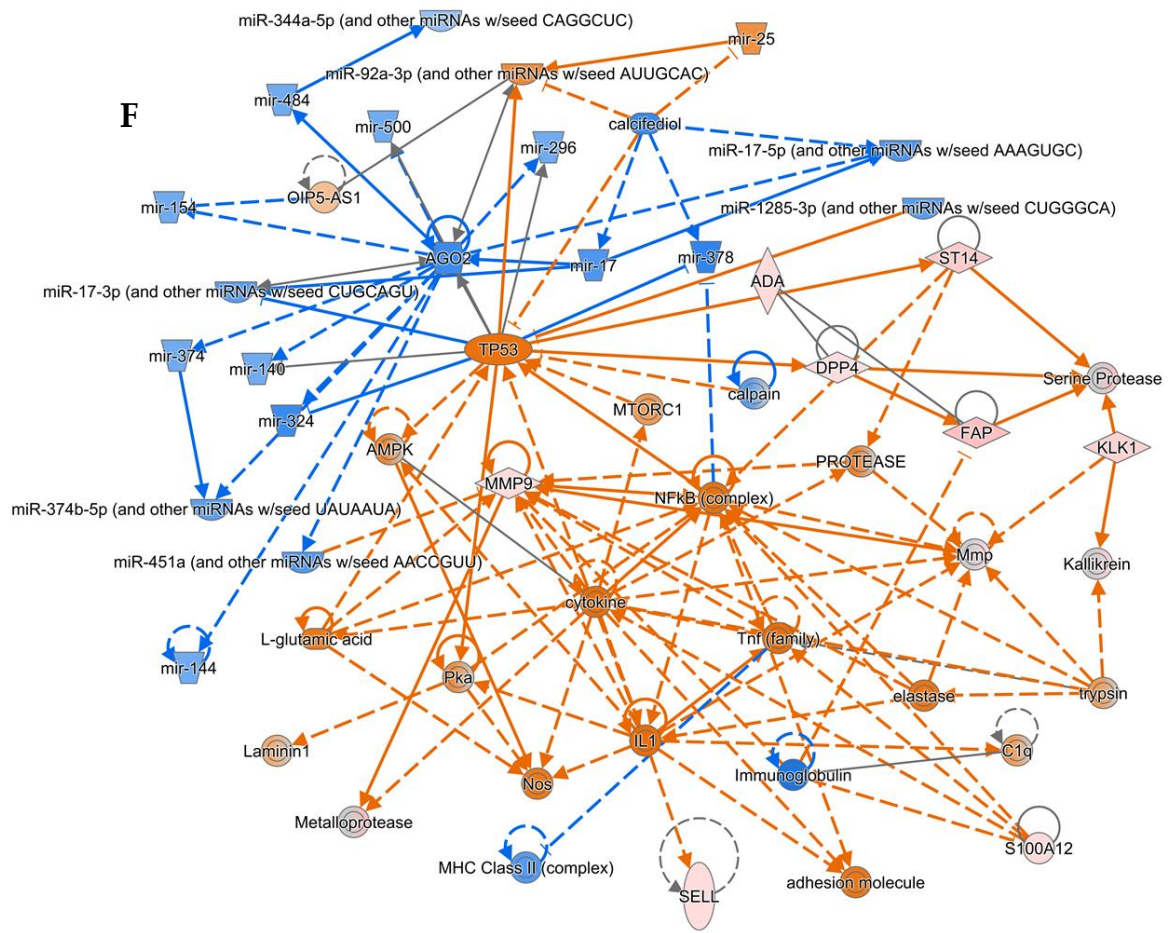

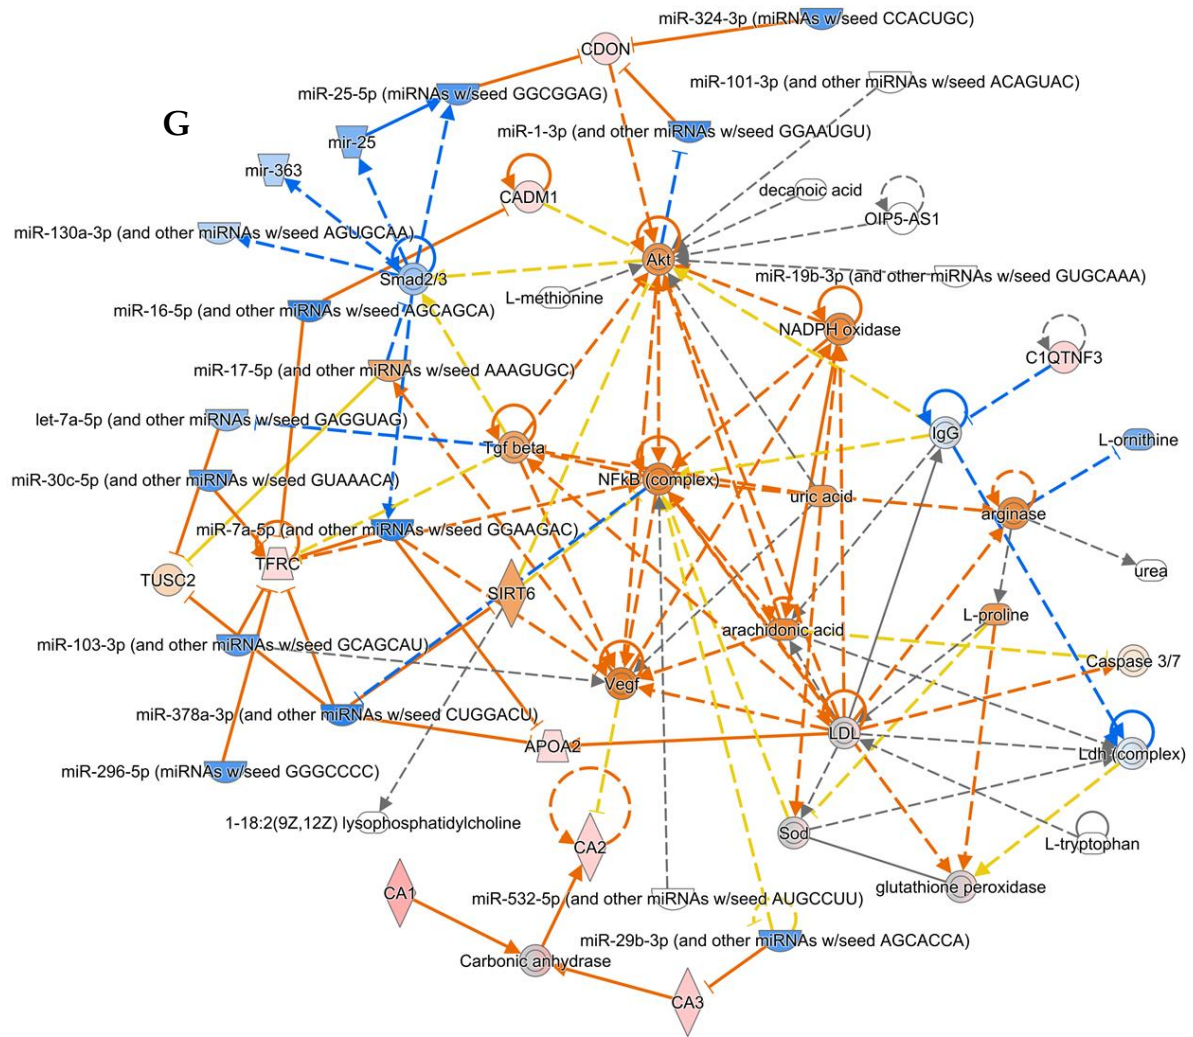

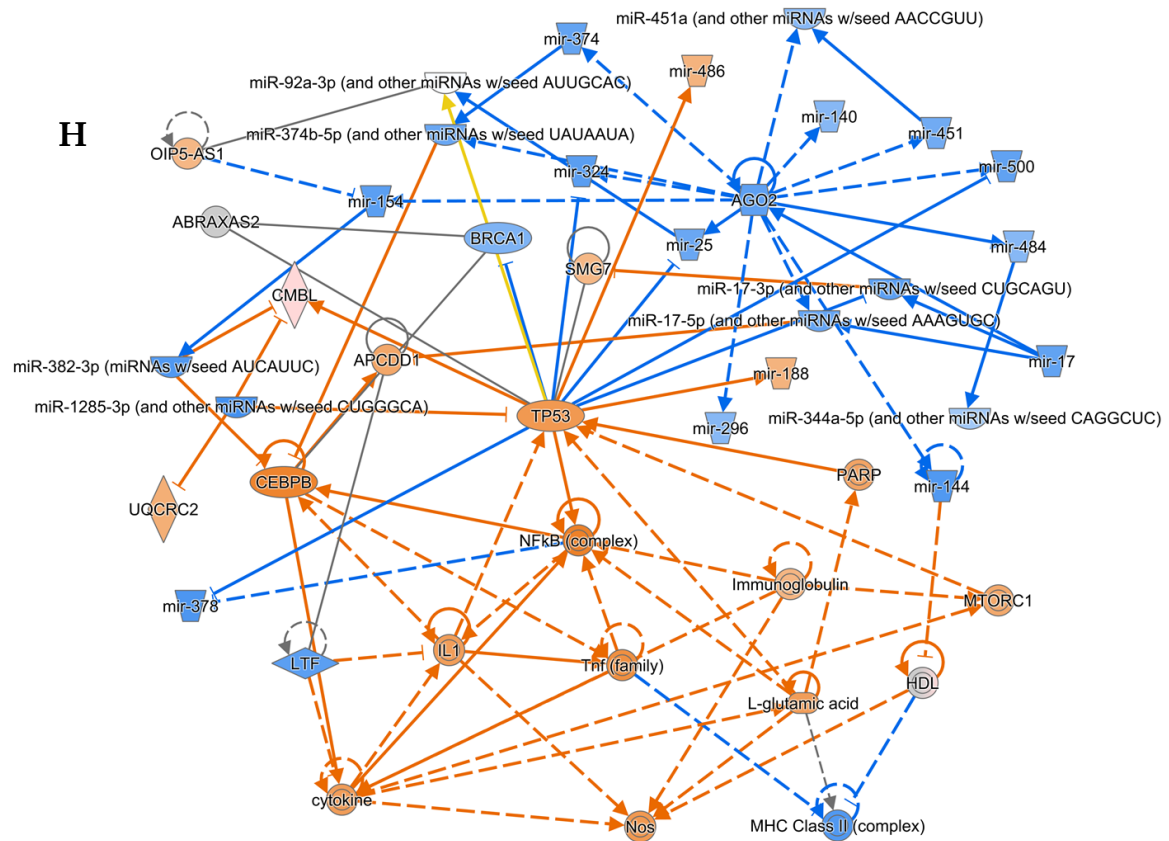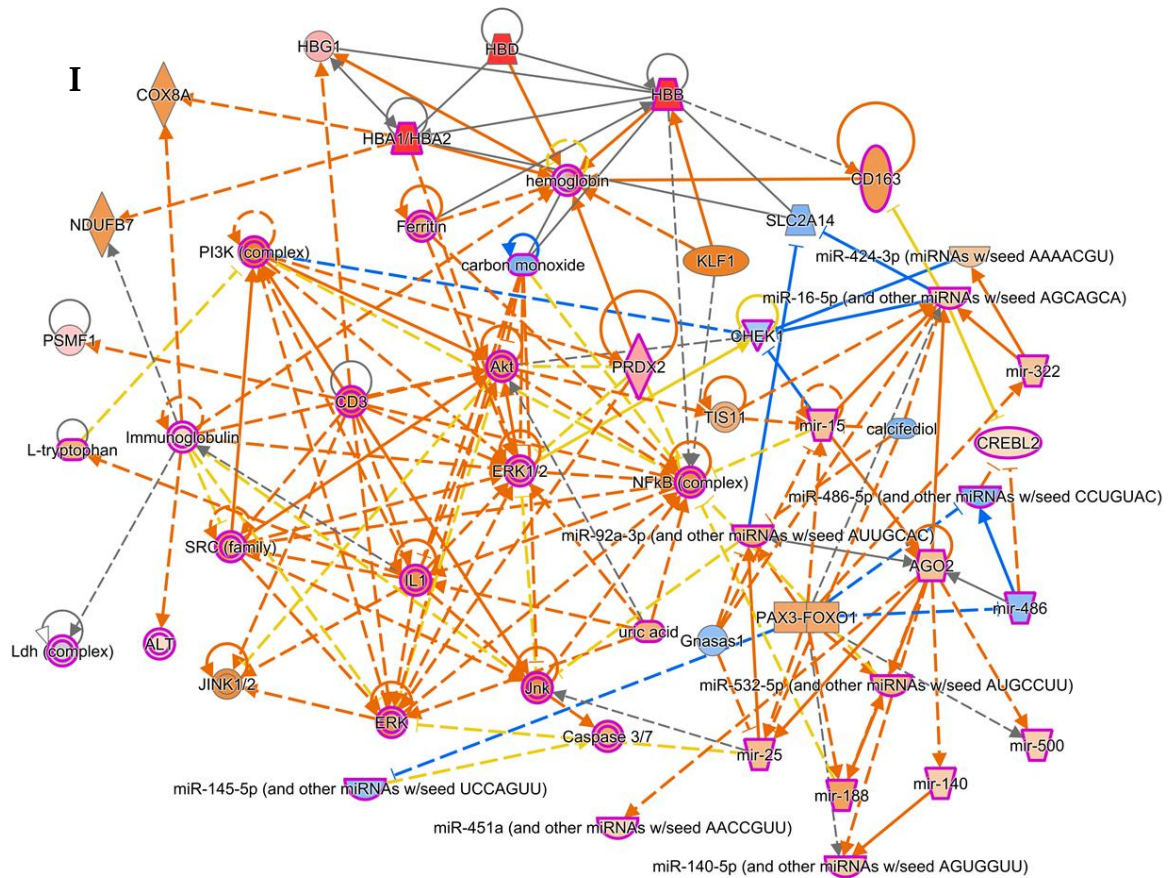



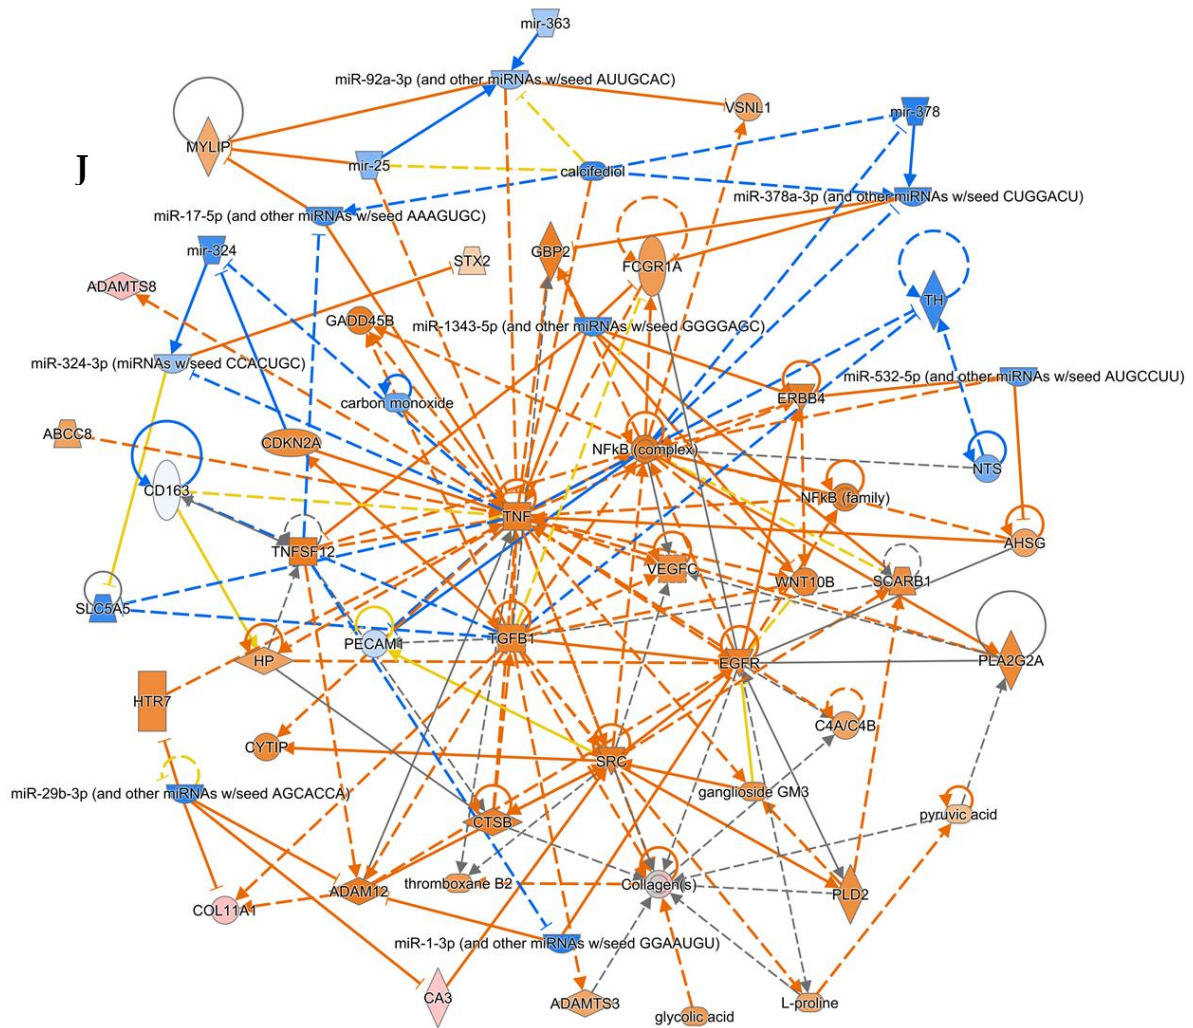

**Figure S3 (corresponds to Figure 6).** Networks predicted at various stringency levels of feature selection in the analyses shown in Figure 6. Networks predicted at the cutoff values of (A–D) 1.1, (E,F) 1.2, (G,H) 1.3, and (I,J) 2.0. See Figure 6 for a summary of key molecules consistently predicted at the different cutoff values in these analyses. Marker shape key – horizontal-oval: transcription regulator; vertical-oval: transmembrane receptor; diamond: enzyme; square: cytokine; vertical-rectangle: G-protein coupled receptor; broken-lined vertical-rectangle: ion channel; horizontal-diamond: peptidase; trapezoid: transporter; concentric circle: complex; circle: other; horizontal ellipse: metabolite; cut ellipsoid: microRNA; and inverted trapezoid: microRNA family. Marker color key – orange: predicted activation, blue: predicted inhibition. Connecting line color key – orange: activation; blue: inhibition; yellow: findings are inconsistent with the state of the downstream molecule; and gray: not predicted.

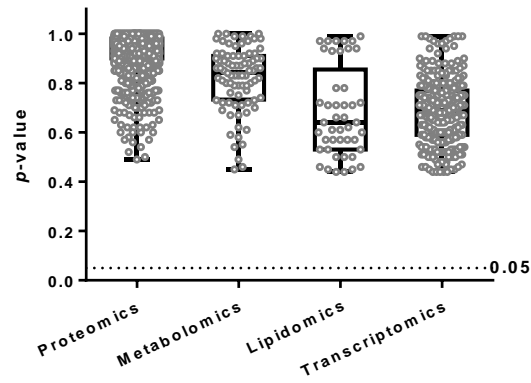

**Figure S4.** Variance within the high-risk T1D group with and without including the one new-onset subject. Shown are  $p$ -values of the comparison (by  $t$ -test) within the high-risk T1D group showing that no significant change ( $p < 0.05$ ; dotted horizontal line) within the group is caused by inclusion of the one new-onset subject. Data points correspond to each analyte/feature identified by each omics approach in all samples without exception.



**Table S1.** Demographic, serological, and other information of subjects from whom blood samples were obtained in this study. Subjects are divided in two groups, namely the high-risk T1D and healthy (control) subjects, in accordance with the TrialNet staging system for T1D risk.

| High-risk T1D subjects |             |     |                 |                                           |                |                                                               |                                 |                                 |                                 |                                 |                                          |           |                       |
|------------------------|-------------|-----|-----------------|-------------------------------------------|----------------|---------------------------------------------------------------|---------------------------------|---------------------------------|---------------------------------|---------------------------------|------------------------------------------|-----------|-----------------------|
| Subject #              | Age (years) | Sex | Race/Ethnicity  | 1 <sup>st</sup> degree relatives with T1D | AAbs #         | Autoantibodies (years since positive until sample collection) |                                 |                                 |                                 |                                 | HLA typing                               |           |                       |
|                        |             |     |                 |                                           |                | GAD65/<br>GAD65H                                              | ICA512/<br>IA-2H                | mIAA                            | ICA                             | Znt8                            | DQA1*0120/DQB1*0602<br>protective allele | DQB1*0302 | OGTT                  |
| 1                      | 13          | M   | White Caucasian | Yes                                       | 5              | Positive (<1 year) <sup>1</sup>                               | Positive (<1 year) <sup>1</sup> | Positive (<1 year) <sup>1</sup> | Positive (<1 year) <sup>1</sup> | Positive (<1 year) <sup>1</sup> | ND                                       | ND        | Abnormal <sup>2</sup> |
| 2                      | 14          | M   | White Caucasian | Yes                                       | 4 <sup>3</sup> | Positive (9 years)                                            | Positive (6 years)              | Positive (9 years)              | Positive (5 years)              | Questionable <sup>3</sup>       | Negative                                 | Positive  | Normal                |
| 3                      | 14          | M   | White Hispanic  | Yes                                       | 5              | Positive (9 years)                                            | Positive (9 years)              | Positive (12 years)             | Positive (12 years)             | Positive (3 years)              | Negative                                 | Negative  | Normal                |
| 4                      | 11          | F   | White Caucasian | Yes                                       | 5              | Positive (6 years)                                            | Positive (3 years)              | Positive (5 years)              | Positive (6 years)              | Positive (6 years)              | Negative                                 | Positive  | Normal                |
| Healthy subjects       |             |     |                 |                                           |                |                                                               |                                 |                                 |                                 |                                 |                                          |           |                       |
| 1                      | 22          | F   | White Caucasian | No                                        | 0              | Negative                                                      | Negative                        | Negative                        | Negative                        | Negative                        | ND                                       | ND        | Normal                |
| 2                      | 31          | F   | White Caucasian | No                                        | 0              | Negative                                                      | Negative                        | Negative                        | Negative                        | Negative                        | ND                                       | ND        | Normal                |
| 3                      | 19          | M   | White Hispanic  | No                                        | 0              | Negative                                                      | Negative                        | Negative                        | Negative                        | Negative                        | ND                                       | ND        | Normal                |
| 4                      | 34          | M   | Asian           | No                                        | 0              | Negative                                                      | Negative                        | Negative                        | Negative                        | Negative                        | ND                                       | ND        | Normal                |

<sup>1</sup> Subject confirmed positive for all 5 autoantibodies (AABs) twice before sample collection for this study. 1<sup>st</sup> and 2<sup>nd</sup> positive confirmations were respectively 4 and 1 months prior to sample collection.

<sup>2</sup> Two samples collected for this study two weeks apart, 1<sup>st</sup> sample collected before OGTT (fasting) and 2<sup>nd</sup> after OGTT (post-prandial) when diagnosis was confirmed.

<sup>3</sup> ZnT8 was positive in 2017 and then negative in 2018.

**Table S2.** Transcriptomics data quality control. All samples showed a minimum of 14.65 million passed-filter 75 nt single-end reads in the RNA sequencing. After removal of reads comprised substantially of adaptor sequences and trimming partial adapter sequences, the reads aligned at an average efficiency of 63% +/- 15% (SD) to the hg38 human reference genome and hg38 RNA database.

| High-risk T1D subjects |             |            |                       |                            |                         |                           |                                      |                                            |
|------------------------|-------------|------------|-----------------------|----------------------------|-------------------------|---------------------------|--------------------------------------|--------------------------------------------|
| Subject #              | PF Clusters | Yield (MB) | % Perfect Index Reads | % of $\geq$ Q30 Bases (PF) | Mean Quality Score (PF) | Reads Passing All Filters | Reads Mapped to genome with Mismatch | Reads Mapped / Passed All Filters Read (%) |
| 1*                     | 16202916    | 1227       | 93.96%                | 91.39%                     | 33.823                  | 13878248                  | 6415772                              | 46.23%                                     |
| 1*                     | 14646469    | 1109       | 92.76%                | 84.67%                     | 32.474                  | 12038011                  | 8359355                              | 69.44%                                     |
| 2                      | 27600411    | 2093       | 93.24%                | 89.14%                     | 33.384                  | 23046222                  | 16995316                             | 73.74%                                     |
| 3                      | 27696989    | 2100       | 94.04%                | 90.91%                     | 33.730                  | 22411557                  | 17273116                             | 77.07%                                     |
| 4                      | 20079312    | 1521       | 90.63%                | 78.94%                     | 31.271                  | 17627203                  | 15119578                             | 85.77%                                     |
| Healthy subjects       |             |            |                       |                            |                         |                           |                                      |                                            |
| Subject #              | PF Clusters | Yield (MB) | % Perfect Index Reads | % of $\geq$ Q30 Bases (PF) | Mean Quality Score (PF) | Reads Passing All Filters | Reads Mapped to genome with Mismatch | Reads Mapped / Passed All Filters Read (%) |
| 1                      | 18547614    | 1406       | 95.11%                | 90.25%                     | 33.595                  | 15982462                  | 7903801                              | 49.45%                                     |
| 2                      | 32940064    | 2500       | 91.34%                | 88.95%                     | 33.313                  | 21716390                  | 14897669                             | 68.60%                                     |
| 3                      | 17248712    | 1306       | 92.78%                | 90.37%                     | 33.610                  | 12379105                  | 6222993                              | 50.27%                                     |
| 4                      | 23922839    | 1814       | 85.17%                | 86.55%                     | 32.808                  | 17548491                  | 8120520                              | 46.27%                                     |

\* Two samples collected for this study from this subject two weeks apart, 1<sup>st</sup> sample collected before OGTT (fasting) and 2<sup>nd</sup> after OGTT (post-prandial) when diagnosis was confirmed

**Table S3. Complete list of candidate biomarkers in high-risk T1D predicted by IPA in the individual quadra-omics datasets.** Biomarker prediction by *IPA* was performed in the individual omics datasets with feature selection threshold at cutoff value of 1.1. The top 10 features (separated by a double line) were selected based on their involvement in central nodes within the global molecular network generated from the combined quadra-omics dataset (also shown in Table 2).

| Feature         | Accession no. <sup>1</sup> | Omics           | Expression               |                      | IPA-predicted Function/Disorder                                                                                                                                                                                                                                                                                                     | Link to T1D |
|-----------------|----------------------------|-----------------|--------------------------|----------------------|-------------------------------------------------------------------------------------------------------------------------------------------------------------------------------------------------------------------------------------------------------------------------------------------------------------------------------------|-------------|
|                 |                            |                 | Fold-change <sup>2</sup> | p-value <sup>3</sup> |                                                                                                                                                                                                                                                                                                                                     |             |
| let-7a-5p       | MIMAT0000062               | Transcriptomics | 1.834                    | 0.133                | Inflammation of organ                                                                                                                                                                                                                                                                                                               |             |
| miR-130a-3p     | MIMAT0000425               | Transcriptomics | 1.503                    | 0.745                | Chronic inflammatory disorder                                                                                                                                                                                                                                                                                                       |             |
| miR-16-5p       | MIMAT0000069               | Transcriptomics | 2.954                    | 0.151                | Maturation of monocytes, chronic inflammatory disorder, inflammation of organ                                                                                                                                                                                                                                                       | [109]       |
| miR-296-5p      | MIMAT0000690               | Transcriptomics | 1.444                    | 0.696                | Inflammation of organ                                                                                                                                                                                                                                                                                                               | [110]       |
| miR-30c-5p      | MIMAT0000244               | Transcriptomics | 1.39                     | 0.326                | Chronic inflammatory disorder, inflammation of organ                                                                                                                                                                                                                                                                                |             |
| miR-324-3p      | MIMAT0000762               | Transcriptomics | 2.682                    | 0.468                | Inflammation of organ                                                                                                                                                                                                                                                                                                               | [108]       |
| miR-532-5p      | MIMAT0002888               | Transcriptomics | 2.484                    | 0.122                | Chronic inflammatory disorder, inflammation of organ                                                                                                                                                                                                                                                                                |             |
| miR-92a-3p      | MIMAT0000092               | Transcriptomics | 21.029                   | 0.146                | Induction of follicular T helper precursor cells, chronic inflammatory disorder, inflammation of organ                                                                                                                                                                                                                              |             |
| Uric acid       | 69-93-2                    | Metabolomics    | 2.008                    | 0.872                | Activation of macrophages, immune response of cells, induction of peripheral blood lymphocytes, inflammation of organ                                                                                                                                                                                                               | [111]       |
| LPC 1-18:1(11Z) |                            | Lipidomics      | 1.549                    | 0.00949              | None                                                                                                                                                                                                                                                                                                                                |             |
| HBA1/HBA2       | P69905                     | Proteomics      | 54.293                   | 0.383                | Chronic inflammatory disorder, diabetes mellitus, inflammation of organ, systemic autoimmune syndrome                                                                                                                                                                                                                               |             |
| miR-3131        | MIMAT0014996               | Transcriptomics | 44.427                   | 0.125                | Inflammation of organ                                                                                                                                                                                                                                                                                                               |             |
| miR-150-3p      | MIMAT0004610               | Transcriptomics | 5.17                     | 0.181                | Chronic inflammatory disorder, inflammation of organ                                                                                                                                                                                                                                                                                | [115]       |
| miR-486-5p      | MIMAT0002177               | Transcriptomics | 3.268                    | 0.00272              | Inflammation of organ                                                                                                                                                                                                                                                                                                               | [116]       |
| miR-629-5p      | MIMAT0004810               | Transcriptomics | 2.625                    | 0.0861               | Inflammation of organ                                                                                                                                                                                                                                                                                                               |             |
| miR-500a-3p     | MIMAT0002871               | Transcriptomics | 2.144                    | 0.561                | Inflammation of organ                                                                                                                                                                                                                                                                                                               |             |
| Citric acid     | 5949-29-1                  | Metabolomics    | 1.997                    | 0.959                | Accumulation of pyruvic acid, inflammation of organ                                                                                                                                                                                                                                                                                 |             |
| D-glucose       | 50-99-7                    | Metabolomics    | 1.997                    | 0.636                | Accumulation of pyruvic acid, activation of macrophages, cell viability of islet cells, immune response of cells, proliferation of CD4+ T-lymphocytes, release of arachidonic acid, inflammation of organ                                                                                                                           |             |
| Urea            | 57-13-6                    | Metabolomics    | 1.986                    | 0.444                | Inflammation of organ                                                                                                                                                                                                                                                                                                               |             |
| Cholesterol     | 57-88-5                    | Metabolomics    | 1.964                    | 0.153                | Activation of macrophages, cell spreading of transitional B lymphocytes, chemotaxis of pro-B lymphocytes, immune response of cells, inflammation of organ, proliferation of CD4+ T-lymphocytes, release of arachidonic acid, ruffling of transitional B lymphocytes, inflammation of organ, systemic inflammatory response syndrome | [117]       |

|                                  |               |                 |       |       |                                                                                                                                                                                                                          |       |
|----------------------------------|---------------|-----------------|-------|-------|--------------------------------------------------------------------------------------------------------------------------------------------------------------------------------------------------------------------------|-------|
| COL1A1                           | P02452        | Proteomics      | 1.811 | 0.306 | Cell movement of T lymphocytes, transmigration of lymphocytes, transmigration of monocytes, chronic inflammatory disorder, diabetes mellitus, diabetic complication, inflammation of organ, systemic autoimmune syndrome |       |
| miR-1285-3p                      | MIMAT0005876  | Transcriptomics | 1.753 | 0.57  | Inflammation of organ                                                                                                                                                                                                    |       |
| miR-344a-5p                      | MIMAT0002174  | Transcriptomics | 1.748 | 0.191 | Inflammation of organ                                                                                                                                                                                                    |       |
| CA2                              | P54289        | Proteomics      | 1.678 | 0.39  | Chronic inflammatory disorder, diabetes mellitus, diabetic complication, inflammation of organ, systemic autoimmune syndrome                                                                                             | [118] |
| CAT                              | <u>P04040</u> | Proteomics      | 1.669 | 0.412 | Diabetes mellitus, inflammation of organ, systemic autoimmune syndrome                                                                                                                                                   | [119] |
| CDH11                            | <u>P55287</u> | Proteomics      | 1.464 | 0.422 | Inflammation of organ, chronic inflammatory disorder, diabetes mellitus, diabetic complication, inflammation of organ, systemic autoimmune syndrome                                                                      |       |
| ALDH1A1                          | P00352        | Proteomics      | 1.446 | 0.47  | Diabetes mellitus                                                                                                                                                                                                        | [120] |
| LDLR                             | P01130        | Proteomics      | 1.443 | 0.532 | Cell movement of T lymphocytes, diabetes mellitus, inflammation of organ, quantity of IL-10 in blood, transmigration of lymphocytes, transmigration of monocytes, diabetic complication                                  | [121] |
| PC 18:2(9Z,12Z)/<br>18:2(9Z,12Z) |               | Lipidomics      | 1.387 | 0.186 | None                                                                                                                                                                                                                     |       |
| TFRC                             | P02786        | Proteomics      | 1.358 | 0.584 | Inflammation of organ, chronic inflammatory disorder, systemic autoimmune syndrome                                                                                                                                       | [122] |
| FN1                              | P02751        | Proteomics      | 1.317 | 0.553 | Cell movement of T lymphocytes, transmigration of lymphocytes, transmigration of monocytes, chronic inflammatory disorder, diabetes mellitus, diabetic complication, inflammation of organ, systemic autoimmune syndrome | [123] |
| BGLAP                            | P02818        | Proteomics      | 1.311 | 0.58  | Chronic inflammatory disorder, diabetes mellitus, systemic autoimmune syndrome                                                                                                                                           | [124] |
| MMP9                             | P14780        | Proteomics      | 1.307 | 0.582 | Cell movement of T lymphocytes, chronic inflammatory disorder, inflammation of organ, quantity of IL-10 in blood, transmigration of monocytes, diabetes mellitus, systemic autoimmune syndrome                           | [125] |

<sup>1</sup> Accession numbers corresponding to mature miRNAs in the miRbase database, proteins in the human SwissProt database (from Uniprot Knowledgebase), and metabolites in the American Chemical Society (CAS = Chemical Abstract Service). Lipids were annotated in the Thermo Scientific proprietary Lipid Search 4.1 database built into their software without access to accession numbers.

<sup>2</sup> Predicted expression fold-change in the high-risk T1D subjects relative to healthy controls.

<sup>3</sup> Non-adjusted *p*-value as obtained from IPA software based on comparisons of high-risk T1D subjects vs. healthy controls in each omics-type dataset independently (*t*-test). Only LPC from the lipidomics and miR-486-5p from transcriptomics datasets had *p* < 0.05.
